# Supplementary material for: Optimization of Gallic Acid-Rich Extract from Mango (Mangifera indica) Seed Kernels through Ultrasound-Assisted Extraction
Source: MDPI journal article supplement (doi:10.3390/separations10070376), 2023-06-26
Supplement: s1 [file s1]

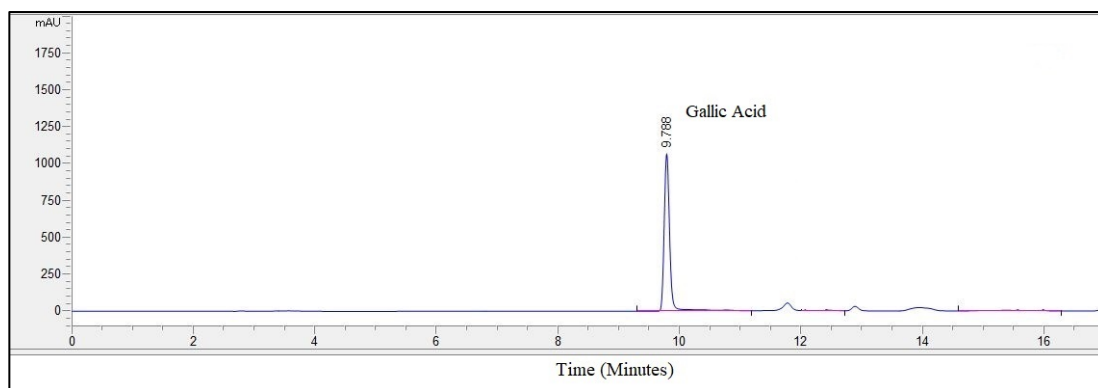

(a)

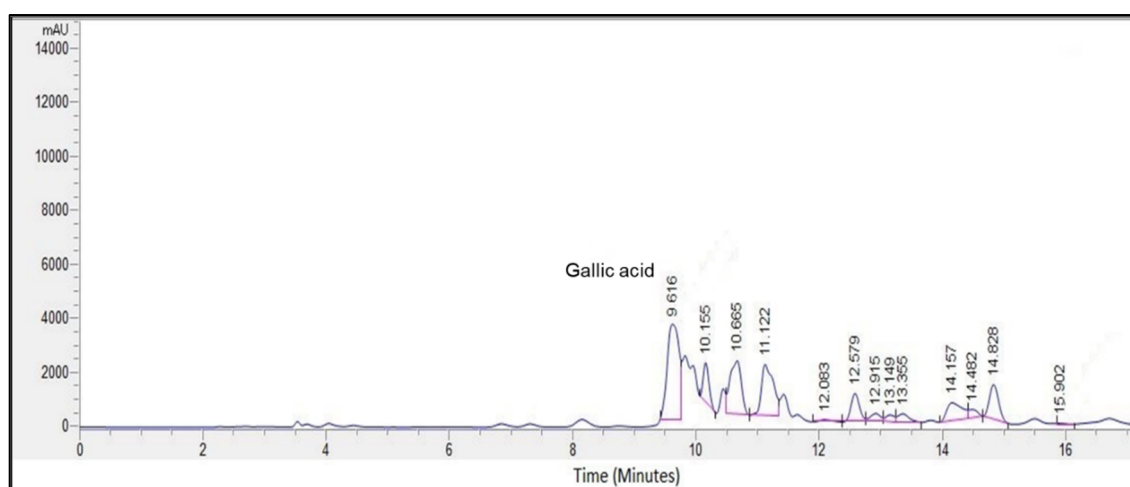

(b)

**Figure S1:** Chromatogram showing peaks of (a) Gallic acid standard (b) Gallic acid rich extract of mango seed kernel
